# Supplementary material for: Evolution of surrogate light chain in tetrapods and the relationship between lengths of CDR H3 and VpreB tails
Source: Front Immunol. 2022 Oct 13;13:1001134. doi: 10.3389/fimmu.2022.1001134 (PMC9614664; doi:10.3389/fimmu.2022.1001134)
Supplement: Supplementary file 1 [file Table_1.xlsx]

## Sheet: Suppl Table 1 Accessions
	Supplemental Table 1. Accession numbers of sequences used in alignments and phylogenetic trees. Rows highlighted in gray indicate a gene not found for that species.
	Clade	Taxonomic Order	Cladogram branch name	Species common name	Species Latin name	Gene	Accession number	Current annotation
1	Amphibia	Gymnophiona	Caecilian	Caecilian	Rhinatrema bivittatum	VpreB3	XM_029571030.1	VPREB3
2	Testudinata	Testudines	Turtle	Chinese soft-shelled turtle	Pelodiscus sinensis	VpreB3	XM_006126099.2	VPREB3
3	Lepidosauria	Squamata	Snake	Eastern brown snake	Pseudonaja textilis	VpreB3	XM_026718606.1	VPREB3
4	Archosauria	Crocodilia	Alligator	American alligator	Alligator mississippiensis	VpreB3	NW_017711467.1 (24,269..24,917)	VpreB3 (LOC106737354)
5	Archosauria	Galliformes	Chicken	Chicken	Gallus gallus	VpreB3	XM_415223.7	VpreB3
6	Prototheria	Monotremata	Platypus	Duck-billed platypus	Ornithorhynchus anatinus	VpreB3	XM_029048751.1	VpreB3
7	Marsupialia	Didelphimorphia	Opossum	Gray short-tailed opossum	Monodelphis domestica	VpreB3	JN863116.1	VpreB3
8	Marsupialia	Diprotodontia	Koala	Koala	Phascolarctos cinereus	VpreB3	XM_020977645.1	VpreB3 (LOC110201766)
9	Afrotheria	Proboscidea	Elephant	African savannah elephant	Loxodonta africana	VpreB3	XM_003419087.2|NW_003573488.1 (583,036..585,326)	VpreB3 (LOC100664020)
10	Afrotheria	Sirenia	Manatee	Florida manatee	Trichechus manatus latirostris	VpreB3	XM_004386202.2	VpreB3 (LOC101344160)
11	Afrotheria	Tubulidentata	Aardvark	Aardvark	Orycteropus afer	VpreB3	XM_007958775.1	VpreB3
12	Afrotheria	Macroscelidea	Elephant shrew	Cape elephant shrew	Elephantulus edwardii	VpreB3	XM_006903014.1	VpreB3
13	Afrotheria	Afrosoricida	Golden mole	Lesser hedgehog tenrec	Echinops telfairi	VpreB3	XM_013008249.2	VpreB3 (LOC101653840)
14	Xenartha	Cingulata	Armadillo	Nine-banded armadillo	Dasypus novemcinctus	VpreB3	XM_004466415.3	VpreB3
15	Xenartha	Pilosa	Sloth	Southern two-toed sloth	Choloepus didactylus	VpreB3	XM_037823653.1	VpreB3
16	Laurasiatheria	Eulipotyphla	Hedgehog	Western European hedgehog	Erinaceus europaeus	VpreB3	XM_016194004.1	VpreB3
17	Laurasiatheria	Chiroptera	Bat	Natal long-fingered bat	Miniopterus natalensis	VpreB3	XM_016204251.1	VpreB3
18	Laurasiatheria	Chiroptera	Bat	Greater horseshoe bat	Rhinolophus ferrumequinum	VpreB3	XM_033098033.1	VpreB3
19	Laurasiatheria	Chiroptera	Bat	Little brown bat	Myotis lucifugus	VpreB3	XM_006099502.3	VpreB3
20	Laurasiatheria	Chiroptera	Bat	Big brown bat	Eptesicus fuscus	VpreB3	XM_008142891.2	VpreB3
21	Laurasiatheria	Chiroptera	Bat	Large flying fox	Pteropus vampyrus	VpreB3	XM_011355966.2	VpreB3 (LOC105289334)
22	Laurasiatheria	Chiroptera	Bat	Common vampire bat	Desmodus rotundus	VpreB3	XM_024557219.1	VpreB3
23	Laurasiatheria	Pholidota	Pangolin	Malayan Pangolin	Manis javanica	VpreB3	XM_017646181.2	VpreB3
24	Laurasiatheria	Carnivora	Dog	Meerkat	Suricata suricatta	VpreB3	XM_029922688.1	VpreB3
25	Laurasiatheria	Carnivora	Dog	Dog	Canis lupus familiaris	VpreB3	XM_038459448.1	VpreB3
26	Laurasiatheria	Carnivora	Dog	Cheetah	Acinonyx jubatus	VpreB3	XM_015086728.2	VpreB3
27	Laurasiatheria	Carnivora	Seal	Pacific Walrus	Odobenus rosmarus divergens	VpreB3	XM_004400521.2	VpreB3
28	Laurasiatheria	Carnivora	Seal	California sea lion	Zalophus californianus	VpreB3	XM_027577267.2	VpreB3
29	Laurasiatheria	Carnivora	Seal	Stellar Sea Lion	Eumetopias jubatus	VpreB3	XM_028095511.1	VpreB3
30	Laurasiatheria	Carnivora	Seal	Harbor seal	Phoca vitulina	VpreB3	XM_032397574.1	VpreB3
31	Laurasiatheria	Carnivora	Seal	Northern fur seal	Callorhinus ursinus	VpreB3	XM_025857322.1	VpreB3
32	Laurasiatheria	Carnivora	Seal	Sea Otter	Enhydra lutris kenyoni	VpreB3	XM_022495989.1	VpreB3 (LOC111142696)
33	Laurasiatheria	Perissodactyla	Horse	Domestic horse	Equus caballus	VpreB3	XM_001490310.4	VpreB3
34	Laurasiatheria	Perissodactyla	Horse	Southern white rhinoceros	Ceratotherium simum simum	VpreB3	XM_004443105.2	VpreB3
35	Laurasiatheria	Artiodactyla	Pig	Pig	Sus scrofa	VpreB3	XM_001929470.5	VpreB3
36	Laurasiatheria	Artiodactyla	Cattle	Goat	Capra hircus	VpreB3	XM_018060914.1	VpreB3
37	Laurasiatheria	Artiodactyla	Cattle	Arabian camel	Camelus dromedarius	VpreB3	XM_010987323.2	VpreB3
38	Laurasiatheria	Artiodactyla	Cattle	Alpaca	Vicugna pacos	VpreB3	XM_006213352.3	VpreB3
39	Laurasiatheria	Artiodactyla	Cattle	American bison	Bison bison	VpreB3	XM_010841643.1	VpreB3
40	Laurasiatheria	Artiodactyla	Cattle	Wild yak	Bos mutus	VpreB3	XM_005901590.2	VpreB3
41	Laurasiatheria	Artiodactyla	Cattle	Water buffalo	Bubalus bubalis	VpreB3	XM_025267295.1	VpreB3
42	Laurasiatheria	Artiodactyla	Cattle	Cattle	Bos taurus	VpreB3	NM_001281906.1	VpreB3
43	Laurasiatheria	Cetacea	Whale	Narwhal	Monodon monoceros	VpreB3	XM_029216312.1	VpreB3
44	Laurasiatheria	Carnivora	Seal	Yangtze finless porpose	Neophocaena asiaeorientalis	VpreB3	XM_024763946.1|7,708,850..7,710,286	VpreB3
45	Laurasiatheria	Cetacea	Whale	Vaquita	Phocoena sinus	VpreB3	XM_032602835.1	VpreB3
46	Laurasiatheria	Cetacea	Whale	Beluga whale	Delphinapterus leucas	VpreB3	XM_022551303.1	VpreB3
47	Laurasiatheria	Cetacea	Whale	Sperm whale	Physeter catodon	VpreB3	XM_007127190.3	VpreB3
48	Laurasiatheria	Cetacea	Whale	Minke whale	Balaenoptera acutorostrata scammoni	VpreB3	XM_007196301.2	VpreB3
49	Euarchontoglires	Lagomorpha	Rabbit	European rabbit	Oryctolagus cuniculus	VpreB3	XM_002724010.3	VpreB3
50	Euarchontoglires	Rodentia	Mouse	Chinese hamster	Cricetulus griseus	VpreB3	XM_003508100.3	VpreB3
51	Euarchontoglires	Rodentia	Mouse	House mouse	Mus musculus	VpreB3	NM_009514.5	VpreB3
52	Euarchontoglires	Rodentia	Mouse	Ryukyu mouse	Mus caroli	VpreB3	XM_021173535.2	VpreB3
53	Euarchontoglires	Rodentia	Mouse	Shrew mouse	Mus pahari	VpreB3	XM_021205838.2	VpreB3
54	Euarchontoglires	Rodentia	Mouse	Upper Galilee Mountains blind mole rat	Nannospalax galili	VpreB3	XM_008840624.2	VpreB3
55	Euarchontoglires	Rodentia	Mouse	Norway rat	Rattus norvegicus	VpreB3	NM_001108930.1	VpreB3
56	Euarchontoglires	Rodentia	Mouse	Mongolian Gerbil	Meriones unguiculatus	VpreB3	XM_021653743.1	VpreB3
57	Euarchontoglires	Scandentia	Tree shrew	Chinese tree shrew	Tupaia chinensis	VpreB3	XM_014586784.2	VpreB3
58	Euarchontoglires	Dermoptera	Flying lemur	Sunda flying lemur	Galeopterus variegatus	VpreB3	XM_008568600.1	VpreB3
59	Euarchontoglires	Primata (Strepsirhini)	Lemur	Gray mouse lemur	Microcebus murinus	VpreB3	XM_012776743.2	VpreB3
60	Euarchontoglires	Primata	Macaque	Crab-eating macaque	Macaca fascicularis	VpreB3	XM_015444519.1|NW_005093478.1 (185,442..187,168)	VpreB3
61	Euarchontoglires	Primata	Human	Olive baboon	Papio anubis	VpreB3	XM_003918567.4	VpreB3
62	Euarchontoglires	Primata	Human	Northern white-cheeked gibbon	Nomascus leucogenys	VpreB3	XM_003281724.3	VpreB3
63	Euarchontoglires	Primata	Human	Western lowland gorilla	Gorilla gorilla	VpreB3	XM_004063150.2	VpreB3
64	Euarchontoglires	Primata	Human	Human	Homo sapiens	VpreB3	NM_013378.3	VpreB3
1	Amphibia	Gymnophiona	Caecilian	Caecilian	Rhinatrema bivittatum	PTCRA
2	Testudinata	Testudines	Turtle	Chinese soft-shelled turtle	Chelonoidis abingdonii	PTCRA	XM_032780488.1	PTCRA
3	Lepidosauria	Squamata	Snake	Eastern brown snake	Pseudonaja textilis	PTCRA	XM_026695916.1|NW_020769313.1 (26,376,808..26,381,081)	PTCRA
4	Archosauria	Crocodilia	Alligator	American alligator	Alligator mississippiensis	PTCRA	XM_019476450.1|NW_017713645.1 (1,501,980..1,509,542)	PTCRA
5	Archosauria	Galliformes	Chicken	Chicken	Gallus gallus	PTCRA	XM_015283548.3|NC_052534.1 (15,726,053..15,727,094)	PTCRA
6	Prototheria	Monotremata	Platypus	Duck-billed platypus	Ornithorhynchus anatinus	PTCRA	XM_029047496.1|NC_041746.1 (13,733,403..13,737,445)	PTCRA
7	Marsupialia	Didelphimorphia	Opossum	Gray short-tailed opossum	Monodelphis domestica	PTCRA	XM_007483932.2	PTCRA
8	Marsupialia	Diprotodontia	Koala	Koala	Phascolarctos cinereus	PTCRA	XM_020976857.1	PTCRA
9	Afrotheria	Proboscidea	Elephant	African savannah elephant	Loxodonta africana	PTCRA	XM_003404182.2	PTCRA
10	Afrotheria	Sirenia	Manatee	Florida manatee	Trichechus manatus latirostris	PTCRA	XM_004379558.1	PTCRA (LOC101358764)
11	Afrotheria	Tubulidentata	Aardvark	Aardvark	Orycteropus afer	PTCRA	XM_007936314.1	PTCRA
12	Afrotheria	Macroscelidea	Elephant shrew	Cape elephant shrew	Elephantulus edwardii	PTCRA	XM_006882146.1	PTCRA
13	Afrotheria	Afrosoricida	Golden mole	Lesser hedgehog tenrec	Echinops telfairi	PTCRA	XM_004710858.1	PTCRA
14	Xenartha	Cingulata	Armadillo	Nine-banded armadillo	Dasypus novemcinctus	PTCRA	XM_004451345.3	PTCRA
15	Xenartha	Pilosa	Sloth	Southern two-toed sloth	Choloepus didactylus	PTCRA	XM_037844683.1	PTCRA
16	Laurasiatheria	Eulipotyphla	Hedgehog	Western European hedgehog	Erinaceus europaeus	PTCRA	XM_007537372.1	PTCRA
17	Laurasiatheria	Chiroptera	Bat	Natal long-fingered bat	Miniopterus natalensis	PTCRA	XM_016212668.1	PTCRA
18	Laurasiatheria	Chiroptera	Bat	Greater horseshoe bat	Rhinolophus ferrumequinum	PTCRA	XM_033100321.1	PTCRA
19	Laurasiatheria	Chiroptera	Bat	Little brown bat	Myotis lucifugus	PTCRA	XM_023763188.1	PTCRA (LOC102430547)
20	Laurasiatheria	Chiroptera	Bat	Big brown bat	Eptesicus fuscus	PTCRA	XM_028127900.1	PTCRA
21	Laurasiatheria	Chiroptera	Bat	Large flying fox	Pteropus vampyrus	PTCRA	XM_011354642.2	PTCRA
22	Laurasiatheria	Chiroptera	Bat	Common vampire bat	Desmodus rotundus	PTCRA	XM_024558072.1	PTCRA
23	Laurasiatheria	Pholidota	Pangolin	Chinese Pangolin	Manis pentadactyla	PTCRA	XM_036907127.1	PTCRA
24	Laurasiatheria	Carnivora	Dog	Meerkat	Suricata suricatta	PTCRA	XM_029945645.1	PTCRA
25	Laurasiatheria	Carnivora	Dog	Dog	Canis lupus familiaris	PTCRA	XM_005627365.3	PTCRA
26	Laurasiatheria	Carnivora	Dog	Cheetah	Acinonyx jubatus	PTCRA	XM_027057731.1	PTCRA
27	Laurasiatheria	Carnivora	Seal	Pacific Walrus	Odobenus rosmarus divergens	PTCRA	XM_004408138.1	PTCRA
28	Laurasiatheria	Carnivora	Seal	California sea lion	Zalophus californianus	PTCRA	XM_027604070.1	PTCRA
29	Laurasiatheria	Carnivora	Seal	Stellar Sea Lion	Eumetopias jubatus	PTCRA	XM_028097851.1	PTCRA
30	Laurasiatheria	Carnivora	Seal	Harbor seal	Phoca vitulina	PTCRA	XM_032410105.1	PTCRA
31	Laurasiatheria	Carnivora	Seal	Northern fur seal	Callorhinus ursinus	PTCRA	XM_025890398.1	PTCRA
32	Laurasiatheria	Carnivora	Seal	Sea Otter	Enhydra lutris kenyoni	PTCRA	XM_022503950.1	PTCRA (LOC111147728)
33	Laurasiatheria	Perissodactyla	Horse	Domestic horse	Equus caballus	PTCRA	XM_023624947.1	PTCRA
34	Laurasiatheria	Perissodactyla	Horse	Southern white rhinoceros	Ceratotherium simum simum	PTCRA	XM_004443999.2	PTCRA (LOC101388561)
35	Laurasiatheria	Artiodactyla	Pig	Pig	Sus scrofa	PTCRA	NM_001257090.1	PTCRA
36	Laurasiatheria	Artiodactyla	Cattle	Goat	Capra hircus	PTCRA	XM_018038665.1	PTCRA
37	Laurasiatheria	Artiodactyla	Cattle	Arabian camel	Camelus dromedarius	PTCRA	XM_031435518.1	PTCRA
38	Laurasiatheria	Artiodactyla	Cattle	Alpaca	Vicugna pacos	PTCRA	XM_031688344.1	PTCRA
39	Laurasiatheria	Artiodactyla	Cattle	American bison	Bison Bison	PTCRA	XM_010863241.1	PTCRA
40	Laurasiatheria	Artiodactyla	Cattle	Wild yak	Bos mutus	PTCRA	XM_005900128.1	PTCRA
41	Laurasiatheria	Artiodactyla	Cattle	Water buffalo	Bubalus bubalis	PTCRA	XM_006069217.2	PTCRA
42	Laurasiatheria	Artiodactyla	Cattle	Cattle	Bos Taurus	PTCRA	NM_001075633.1	PTCRA
43	Laurasiatheria	Cetacea	Whale	Narwhal	Monodon monoceros	PTCRA	XM_029244265.1	PTCRA
44	Laurasiatheria	Carnivora	Seal	Yangtze finless porpose	Neophocaena asiaeorientalis	PTCRA	XM_024766280.1	PTCRA
45	Laurasiatheria	Cetacea	Whale	Vaquita	Phocoena sinus	PTCRA	XM_032647623.1	PTCRA
46	Laurasiatheria	Cetacea	Whale	Beluga whale	Delphinapterus leucas	PTCRA	XM_022581931.2	PTCRA
47	Laurasiatheria	Cetacea	Whale	Sperm whale	Physeter catodon	PTCRA	XM_024122147.1	PTCRA
48	Laurasiatheria	Cetacea	Whale	Minke whale	Balaenoptera acutorostrata scammoni	PTCRA	XM_007197850.1	PTCRA
49	Euarchontoglires	Lagomorpha	Rabbit	European rabbit	Oryctolagus cuniculus	PTCRA	XM_017344864.1	PTCRA
50	Euarchontoglires	Rodentia	Mouse	Chinese hamster	Cricetulus griseus	PTCRA	XM_035450440.1	PTCRA
51	Euarchontoglires	Rodentia	Mouse	House mouse	Mus musculus	PTCRA	NM_011195.2	PTCRA
52	Euarchontoglires	Rodentia	Mouse	Ryukyu mouse	Mus caroli	PTCRA	XM_021185741.1	PTCRA
53	Euarchontoglires	Rodentia	Mouse	Shrew mouse	Mus pahari	PTCRA	XM_021217456.1	PTCRA
54	Euarchontoglires	Rodentia	Mouse	Upper Galilee Mountains blind mole rat	Nannospalax galili	PTCRA	XM_008829113.3	PTCRA
55	Euarchontoglires	Rodentia	Mouse	Norway rat	Rattus norvegicus	PTCRA	XM_003750652.5	PTCRA
56	Euarchontoglires	Rodentia	Mouse	Mongolian Gerbil	Meriones unguiculatus	PTCRA	XM_021640164.1	PTCRA
57	Euarchontoglires	Scandentia	Tree shrew	Chinese tree shrew	Tupaia chinensis	PTCRA	XM_006148555.2	PTCRA
58	Euarchontoglires	Dermoptera	Flying lemur	Sunda flying lemur	Galeopterus variegatus	PTCRA	XM_008566827.1	PTCRA
59	Euarchontoglires	Primata (Strepsirhini)	Lemur	Gray mouse lemur	Microcebus murinus	PTCRA	XM_012773176.1|NC_033665.1 (17,559,948..17,566,472)	PTCRA
60	Euarchontoglires	Primata	Macaque	Crab-eating macaque	Macaca fascicularis	PTCRA	XM_015449396.1|NC_022275.1 (127,656,881..127,667,041)	PTCRA
61	Euarchontoglires	Primata	Human	Olive baboon	Papio anubis	PTCRA	XM_003897607.4	PTCRA
62	Euarchontoglires	Primata	Human	Northern white-cheeked gibbon	Nomascus leucogenys	PTCRA	XM_003266257.4	PTCRA
63	Euarchontoglires	Primata	Human	Western lowland gorilla	Gorilla gorilla	PTCRA	XM_019029468.2	PTCRA
64	Euarchontoglires	Primata	Human	Human	Homo sapiens	PTCRA	NM_138296.3|NC_000006.12 (42,916,053..42,925,838)	PTCRA
1	Amphibia	Gymnophiona	Caecilian	Caecilian	Rhinatrema bivittatum	VpreB1	XM_029619691.1	VpreB1
2	Testudinata	Testudines	Turtle	Chinese soft-shelled turtle	Chelonoidis abingdonii	VpreB1	XM_032764716.1	VpreB1
3	Lepidosauria	Squamata	Snake	Eastern brown snake	Pseudonaja textilis	VpreB1
4	Archosauria	Crocodilia	Alligator	American alligator	Alligator mississippiensis	VpreB1	XM_006260334.2	VpreB1
6	Prototheria	Monotremata	Platypus	Duck-billed platypus	Ornithorhynchus anatinus	VpreB1
7	Marsupialia	Didelphimorphia	Opossum	Gray short-tailed opossum	Monodelphis domestica	VpreB1
8	Marsupialia	Diprotodontia	Koala	Koala	Phascolarctos cinereus	VpreB1
9	Afrotheria	Proboscidea	Elephant	African savannah elephant	Loxodonta africana	VpreB1	XM_023559497.1	VpreB1
10	Afrotheria	Sirenia	Manatee	Florida manatee	Trichechus manatus latirostris	VpreB1	XM_004379111.2	Ig Iota (LOC101361781)
11	Afrotheria	Tubulidentata	Aardvark	Aardvark	Orycteropus afer	VpreB1	XM_007955938.1	Ig Iota (LOC103210013)
12	Afrotheria	Macroscelidea	Elephant shrew	Cape elephant shrew	Elephantulus edwardii	VpreB1	XM_006890513.1	Ig Iota (LOC102868265)
13	Afrotheria	Afrosoricida	Golden mole	Cape golden mole	Chrysochloris asiatica	VpreB1	XM_006874733.1	Ig Iota (LOC102840678)
14	Xenartha	Cingulata	Armadillo	Nine-banded armadillo	Dasypus novemcinctus	VpreB1	XM_004466457.2	VpreB1
15	Xenartha	Pilosa	Sloth	Southern two-toed sloth	Choloepus didactylus	VpreB1	XM_037823652.1	Ig Iota (LOC119524932)
16	Laurasiatheria	Eulipotyphla	Hedgehog	Western European hedgehog	Erinaceus europaeus	VpreB1	XM_016190668.1	Ig Iota (LOC103118576)
17	Laurasiatheria	Chiroptera	Bat	Natal long-fingered bat	Miniopterus natalensis	VpreB1	XM_016204252.1	Ig Omega (LOC107530484)
18	Laurasiatheria	Chiroptera	Bat	Greater horseshoe bat	Rhinolophus ferrumequinum	VpreB1	XM_033098266.1	Ig Iota (LOC117017738)
19	Laurasiatheria	Chiroptera	Bat	Little brown bat	Myotis lucifugus	VpreB1	XM_023763188.1	VpreB1 (LOC102430547)
20	Laurasiatheria	Chiroptera	Bat	Big brown bat	Eptesicus fuscus	VpreB1	XM_008142890.2	Ig Iota (LOC103287211)
21	Laurasiatheria	Chiroptera	Bat	Large flying fox	Pteropus vampyrus	VpreB1	XM_011355962.2	VpreB1
22	Laurasiatheria	Chiroptera	Bat	Common vampire bat	Desmodus rotundus	VpreB1	XM_024557215.1	VpreB1
23	Laurasiatheria	Pholidota	Pangolin	Malayan Pangolin	Manis javanica	VpreB1	XM_017648044.2	VpreB1
24	Laurasiatheria	Carnivora	Dog	Meerkat	Suricata suricatta	VpreB1	XM_029922241.1	VpreB1
25	Laurasiatheria	Carnivora	Dog	Dog	Canis lupus familiaris	VpreB1	XM_038437460.1	Ig Iota (LOC486411)
26	Laurasiatheria	Carnivora	Dog	Cheetah	Acinonyx jubatus	VpreB1	XM_015086727.2	Ig Iota (LOC106988294)
27	Laurasiatheria	Carnivora	Seal	Pacific Walrus	Odobenus rosmarus divergens	VpreB1	XM_004400560.1	Ig Iota (LOC101386373)
28	Laurasiatheria	Carnivora	Seal	California sea lion	Zalophus californianus	VpreB1	XM_027577415.2	Ig Iota (LOC113913254)
29	Laurasiatheria	Carnivora	Seal	Stellar Sea Lion	Eumetopias jubatus	VpreB1	XM_028095513.1	Ig Iota (LOC114202348)
30	Laurasiatheria	Carnivora	Seal	Harbor seal	Phoca vitulina	VpreB1	XM_032397603.1	Ig Iota (LOC116627719)
31	Laurasiatheria	Carnivora	Seal	Northern fur seal	Callorhinus ursinus	VpreB1	XM_025857316.1	Ig Iota (LOC112812519)
32	Laurasiatheria	Carnivora	Seal	Sea Otter	Enhydra lutris kenyoni	VpreB1	XM_022495964.1	Ig Iota (LOC111142648)
33	Laurasiatheria	Perissodactyla	Horse	Domestic horse	Equus caballus	VpreB1	XM_001502296.6	Ig Iota (LOC100072385)
34	Laurasiatheria	Perissodactyla	Horse	Southern white rhinoceros	Ceratotherium simum simum	VpreB1	XM_004442375.2	VpreB1 (LOC101402669)
35	Laurasiatheria	Artiodactyla	Pig	Pig	Sus scrofa	VpreB1	NM_001075117.1	VpreB1
36	Laurasiatheria	Artiodactyla	Cattle	Goat	Capra hircus	VpreB1	NW_017189530.1|216214-227835	Genomic (LOC102185492)
37	Laurasiatheria	Artiodactyla	Cattle	Arabian camel	Camelus dromedarius	VpreB1	XM_031442387.1	Ig Iota (LOC116149954)
38	Laurasiatheria	Artiodactyla	Cattle	Alpaca	Vicugna pacos	VpreB1	XM_031674722.1	VpreB1
39	Laurasiatheria	Artiodactyla	Cattle	American bison	Bison Bison Bison	VpreB1	XM_010852191.1	VpreB1
40	Laurasiatheria	Artiodactyla	Cattle	Wild yak	Bos Mutus	VpreB1	NW_005395494.1|248563..249158	Genomic (LOC102283536)
41	Laurasiatheria	Artiodactyla	Cattle	Water buffalo	Bubalus bubalis	VpreB1	XM_006065603.2	VpreB1
42	Laurasiatheria	Artiodactyla	Cattle	Cattle	Bos Taurus	VpreB1	XM_024977037.1	VpreB1
43	Laurasiatheria	Cetacea	Whale	Narwhal	Monodon monoceros	VpreB1	XM_029226168.1	Ig Iota (LOC114897331)
44	Laurasiatheria	Carnivora	Seal	Yangtze finless porpose	Neophocaena asiaeorientalis	VpreB1	XM_024763934.1|NW_020175053.1 (7,660,658..7,661,305)	Ig Iota (LOC112412287)
45	Laurasiatheria	Cetacea	Whale	Vaquita	Phocoena sinus	VpreB1	XM_032654174.1	VpreB1
46	Laurasiatheria	Cetacea	Whale	Beluga whale	Delphinapterus leucas	VpreB1	XM_022551358.1	Ig Iota (LOC111162995)
47	Laurasiatheria	Cetacea	Whale	Sperm whale	Physeter catodon	VpreB1	XM_024121095.1	IgLL1 (LOC102994165)
48	Laurasiatheria	Cetacea	Whale	Minke whale	Balaenoptera acutorostrata scammoni	VpreB1	XM_028162404.1	Ig Iota (LOC114235777)
49	Euarchontoglires	Lagomorpha	Rabbit	European rabbit	Oryctolagus cuniculus	VpreB1.1	XM_017349626.1	VpreB1
49	Euarchontoglires	Lagomorpha	Rabbit	European rabbit	Oryctolagus cuniculus	VpreB1.2	NM_001171144.1	VpreB2
50	Euarchontoglires	Rodentia	Mouse	Chinese hamster	Cricetulus griseus	VpreB1.1	XM_027413226.2	VpreB1
50	Euarchontoglires	Rodentia	Mouse	Chinese hamster	Cricetulus griseus	VpreB1.2
51	Euarchontoglires	Rodentia	Mouse	House mouse	Mus musculus	VpreB1.1	NM_016982.2	VpreB1
51	Euarchontoglires	Rodentia	Mouse	House mouse	Mus musculus	VpreB1.2	NM_016983.1	VpreB2
52	Euarchontoglires	Rodentia	Mouse	Ryukyu mouse	Mus caroli	VpreB1.1	XM_021185231.2	VpreB1
52	Euarchontoglires	Rodentia	Mouse	Ryukyu mouse	Mus caroli	VpreB1.2	XM_021185645.1	Ig Omega (LOC110312095)
53	Euarchontoglires	Rodentia	Mouse	Shrew mouse	Mus pahari	VpreB1.1	XM_029544212.1	VpreB1
53	Euarchontoglires	Rodentia	Mouse	Shrew mouse	Mus pahari	VpreB1.2	XM_021210095.2	Ig Omega (LOC110330136)
54	Euarchontoglires	Rodentia	Mouse	Upper Galilee Mountains blind mole rat	Nannospalax galili	VpreB1.1	XM_029567897.1	VpreB1
54	Euarchontoglires	Rodentia	Mouse	Upper Galilee Mountains blind mole rat	Nannospalax galili	VpreB1.2	XM_008843002.2	Ig Omega (LOC103742042)
55	Euarchontoglires	Rodentia	Mouse	Norway rat	Rattus norvegicus	VpreB1.1	NM_001108845.1	VpreB1
55	Euarchontoglires	Rodentia	Mouse	Norway rat	Rattus norvegicus	VpreB1.2	NM_001134788.1	VpreB2
56	Euarchontoglires	Rodentia	Mouse	Mongolian Gerbil	Meriones unguiculatus	VpreB1.1	XM_021645926.1	VpreB1
56	Euarchontoglires	Rodentia	Mouse	Mongolian Gerbil	Meriones unguiculatus	VpreB1.2	XM_021653316.1	Ig Omega (LOC110558432)
57	Euarchontoglires	Scandentia	Tree shrew	Chinese tree shrew	Tupaia chinensis	VpreB1	XM_006140222.2	VpreB1
58	Euarchontoglires	Dermoptera	Flying lemur	Sunda flying lemur	Galeopterus variegatus	VpreB1	XM_008593004.1	Ig Iota (LOC103608584)
59	Euarchontoglires	Primata (Strepsirhini)	Lemur	Gray mouse lemur	Microcebus murinus	VpreB1	XM_012776726.1|NW_017968521.1 (215,573..239,551)	Ig Iota (LOC105877808)
60	Euarchontoglires	Primata	Macaque	Crab-eating macaque	Macaca fascicularis	VpreB1	XM_005567854.2 (29,694,482..29,695,911)	Ig Iota (LOC102141130)
61	Euarchontoglires	Primata	Human	Olive baboon	Papio Anubis	VpreB1	XM_003905278.5	Ig Iota (LOC101015156)
62	Euarchontoglires	Primata	Human	Silvery gibbon	Hylobates moloch	VpreB1	XM_032139415.1	Ig Iota (LOC116459135)
63	Euarchontoglires	Primata	Human	Western lowland gorilla	Gorilla gorilla	VpreB1	XM_004063111.3	Ig Iota (LOC101142660)
64	Euarchontoglires	Primata	Human	Human	Homo sapiens	VpreB1	NM_007128.4	VpreB1
1	Amphibia	Gymnophiona	Caecilian	Caecilian	Rhinatrema bivittatum	VpreB2
2	Testudinata	Testudines	Turtle	Chinese soft-shelled turtle	Chelonoidis abingdonii	VpreB2
3	Lepidosauria	Squamata	Snake	Eastern brown snake	Pseudonaja textilis	VpreB2
4	Archosauria	Crocodilia	Alligator	American alligator	Alligator mississippiensis	VpreB2
5	Archosauria	Galliformes	Chicken	Chicken	Gallus gallus	VpreB2
6	Prototheria	Monotremata	Platypus	Duck-billed platypus	Ornithorhynchus anatinus	VpreB2
7	Marsupialia	Didelphimorphia	Opossum	Gray short-tailed opossum	Monodelphis domestica	VpreB2
8	Marsupialia	Diprotodontia	Koala	Koala	Phascolarctos cinereus	VpreB2
9	Afrotheria	Proboscidea	Elephant	African savannah elephant	Loxodonta africana	VPreB2
10	Afrotheria	Sirenia	Manatee	Florida manatee	Trichechus manatus latirostris	VpreB2
11	Afrotheria	Tubulidentata	Aardvark	Aardvark	Orycteropus afer	VpreB2	XM_007958783.1	Ig Omega (LOC103212854)
12	Afrotheria	Macroscelidea	Elephant shrew	Cape elephant shrew	Elephantulus edwardii	VpreB2	XM_006898073.1	Ig Omega (LOC102868601)
13	Afrotheria	Afrosoricida	Golden mole	Cape golden mole	Chrysochloris asiatica	VpreB2
14	Xenartha	Cingulata	Armadillo	Nine-banded armadillo	Dasypus novemcinctus	VpreB2
15	Xenartha	Pilosa	Sloth	Southern two-toed sloth	Choloepus didactylus	VpreB2
16	Laurasiatheria	Eulipotyphla	Hedgehog	Western European hedgehog	Erinaceus europaeus	VpreB2	XM_016194011.1	Ig Omega (LOC103125631)
17	Laurasiatheria	Chiroptera	Bat	Natal long-fingered bat	Miniopterus natalensis	VpreB2	XM_016223472.1	Ig Omega (LOC107545383)
18	Laurasiatheria	Chiroptera	Bat	Greater horseshoe bat	Rhinolophus ferrumequinum	VpreB2
19	Laurasiatheria	Chiroptera	Bat	Little brown bat	Myotis lucifugus	VpreB2
20	Laurasiatheria	Chiroptera	Bat	Big brown bat	Eptesicus fuscus	VpreB2
21	Laurasiatheria	Chiroptera	Bat	Large flying fox	Pteropus vampyrus	VpreB2
22	Laurasiatheria	Chiroptera	Bat	Common vampire bat	Desmodus rotundus	VpreB2
23	Laurasiatheria	Pholidota	Pangolin	Malayan Pangolin	Manis javanica	VpreB2
24	Laurasiatheria	Carnivora	Dog	Meerkat	Suricata suricatta	VpreB2
25	Laurasiatheria	Carnivora	Dog	Dog	Canis lupus familiaris	VpreB2
26	Laurasiatheria	Carnivora	Dog	Cheetah	Acinonyx jubatus	VpreB2
27	Laurasiatheria	Carnivora	Seal	Pacific Walrus	Odobenus rosmarus divergens	VpreB2
28	Laurasiatheria	Carnivora	Seal	California sea lion	Zalophus californianus	VpreB2
29	Laurasiatheria	Carnivora	Seal	Stellar Sea Lion	Eumetopias jubatus	VpreB2
30	Laurasiatheria	Carnivora	Seal	Harbor seal	Phoca vitulina	VpreB2
31	Laurasiatheria	Carnivora	Seal	Northern fur seal	Callorhinus ursinus	VpreB2
32	Laurasiatheria	Carnivora	Seal	Sea Otter	Enhydra lutris kenyoni	VpreB2
33	Laurasiatheria	Perissodactyla	Horse	Domestic horse	Equus caballus	VpreB2	NC_009151.3|7089116..7089686	LOC100062472
34	Laurasiatheria	Perissodactyla	Horse	Southern white rhinoceros	Ceratotherium simum simum	VpreB2	XM_014787213.1	Ig Omega (LOC101388076)
35	Laurasiatheria	Artiodactyla	Pig	Pig	Sus scrofa	VpreB2
36	Laurasiatheria	Artiodactyla	Cattle	Goat	Capra hircus	VpreB2	XM_005691669.3	Ig Omega (LOC102175702)
37	Laurasiatheria	Artiodactyla	Cattle	Bactrian camel	Camelus bactrianus	VpreB2	XM_010950950.1	Ig Omega (LOC105065744)
38	Laurasiatheria	Artiodactyla	Cattle	Alpaca	Vicugna pacos	VpreB2
39	Laurasiatheria	Artiodactyla	Cattle	American bison	Bison bison bison	VpreB2	XM_010828825.1	Ig Omega (LOC104980176)
40	Laurasiatheria	Artiodactyla	Cattle	Wild yak	Bos mutus	VpreB2	NW_005395798.1|4201..5766	Genomic (LOC102279615)
41	Laurasiatheria	Artiodactyla	Cattle	Water buffalo	Bubalus bubalis	VpreB2	NC_037561.1 (2477917..2478985)	IGLL5 (LOC112579894)
42	Laurasiatheria	Artiodactyla	Cattle	Cattle	Bos taurus	VpreB2	NC_037344.1|Chr 17 [70680311..70684743]	LOC511354
43	Laurasiatheria	Cetacea	Whale	Narwhal	Monodon monoceros	VpreB2
44	Laurasiatheria	Carnivora	Seal	Yangtze finless porpose	Neophocaena asiaeorientalis	VpreB2
45	Laurasiatheria	Cetacea	Whale	Vaquita	Phocoena sinus	VpreB2
46	Laurasiatheria	Cetacea	Whale	Beluga whale	Delphinapterus leucas	VpreB2	NW_022098052.1 (11,573,505..11,587,746)	IgLL1 (LOC111163081)
47	Laurasiatheria	Cetacea	Whale	Sperm whale	Physeter catodon	VpreB2
48	Laurasiatheria	Cetacea	Whale	Minke whale	Balaenoptera acutorostrata scammoni	VpreB2
57	Euarchontoglires	Scandentia	Tree shrew	Chinese tree shrew	Tupaia chinensis	VpreB2	XM_027771508.1	IgLL5 (LOC102498951)
58	Euarchontoglires	Dermoptera	Flying lemur	Sunda flying lemur	Galeopterus variegatus	VpreB2	XM_008563452.1	Ig Omega (LOC103581676)
59	Euarchontoglires	Primata (Strepsirhini)	Lemur	Gray mouse lemur	Microcebus murinus	VpreB2
60	Euarchontoglires	Primata	Macaque	Crab-eating macaque	Macaca fascicularis	VpreB2	XM_005567815.2	Ig Omega (LOC102116858)
61	Euarchontoglires	Primata	Human	Olive baboon	Papio anubis	VpreB2
62	Euarchontoglires	Primata	Human	Northern white-cheeked gibbon	Nomascus leucogenys	VpreB2
63	Euarchontoglires	Primata	Human	Western lowland gorilla	Gorilla Gorilla	VpreB2
64	Euarchontoglires	Primata	Human	Human	Homo sapiens	VpreB2
1	Amphibia	Gymnophiona	Caecilian	Caecilian	Rhinatrema bivittatum	IGLL1
2	Testudinata	Testudines	Turtle	Chinese soft-shelled turtle	Chelonoidis abingdonii	IGLL1
3	Lepidosauria	Squamata	Snake	Eastern brown snake	Pseudonaja textilis	IGLL1
4	Archosauria	Crocodilia	Alligator	American alligator	Alligator mississippiensis	IGLL1
5	Archosauria	Galliformes	Chicken	Chicken	Gallus gallus	IGLL1
6	Prototheria	Monotremata	Platypus	Duck-billed platypus	Ornithorhynchus anatinus	IGLL1
7	Marsupialia	Didelphimorphia	Opossum	Gray short-tailed opossum	Monodelphis domestica	IGLL1
8	Marsupialia	Diprotodontia	Koala	Koala	Phascolarctos cinereus	IGLL1
9	Afrotheria	Proboscidea	Elephant	African savannah elephant	Loxodonta africana	IGLL1
10	Afrotheria	Sirenia	Manatee	Florida manatee	Trichechus manatus latirostris	IGLL1	NW_004444093.1|1659083-1667445	Scaffold 00157 (LOC101347284); annotated as pseudogene
11	Afrotheria	Tubulidentata	Aardvark	Aardvark	Orycteropus afer	IGLL1
12	Afrotheria	Macroscelidea	Elephant shrew	Cape elephant shrew	Elephantulus edwardii	IGLL1
13	Afrotheria	Afrosoricida	Golden mole	Cape golden mole	Chrysochloris asiatica	IGLL1	NW_006408824.1|1974641-1974818 (exon1); NW_006411481.1|7706..9552 (exons2/3)	IgLL5 (LOC102830596 on Scaffold02963; IGLL5 (on scaffold00306)
14	Xenartha	Cingulata	Armadillo	Nine-banded armadillo	Dasypus novemcinctus	IGLL1	XP_004466427.1; NW_004482234.1 (520,991..537,865)	IgLL5 (LOC101414129)
15	Xenartha	Pilosa	Sloth	Southern two-toed sloth	Choloepus didactylus	IGLL1
16	Laurasiatheria	Eulipotyphla	Hedgehog	Western European hedgehog	Erinaceus europaeus	IGLL1
17	Laurasiatheria	Chiroptera	Bat	Natal long-fingered bat	Miniopterus natalensis	IGLL1
18	Laurasiatheria	Chiroptera	Bat	Greater horseshoe bat	Rhinolophus ferrumequinum	IGLL1
19	Laurasiatheria	Chiroptera	Bat	Little brown bat	Myotis lucifugus	IGLL1
20	Laurasiatheria	Chiroptera	Bat	Big brown bat	Eptesicus fuscus	IGLL1	XM_028147074.1	IgLL1
21	Laurasiatheria	Chiroptera	Bat	Large flying fox	Pteropus vampyrus	IGLL1	XM_023528299.1	IgLL1
22	Laurasiatheria	Chiroptera	Bat	Common vampire bat	Desmodus rotundus	IGLL1
23	Laurasiatheria	Pholidota	Pangolin	Malayan Pangolin	Manis javanica	IGLL1
24	Laurasiatheria	Carnivora	Dog	Meerkat	Suricata suricatta	IGLL1	XM_029922240.1	IgLL5 (LOC115277841)
25	Laurasiatheria	Carnivora	Dog	Dog	Canis lupus familiaris	IGLL1	XM_038437399.1	IgLL5
26	Laurasiatheria	Carnivora	Dog	Cheetah	Acinonyx jubatus	IGLL1
27	Laurasiatheria	Carnivora	Seal	Pacific Walrus	Odobenus rosmarus divergens	IGLL1
28	Laurasiatheria	Carnivora	Seal	California sea lion	Zalophus californianus	IGLL1	NC_045608.1|26662434-26672471	IgLL7 (LOC113913255)
29	Laurasiatheria	Carnivora	Seal	Stellar Sea Lion	Eumetopias jubatus	IGLL1	XM_028095514.1	IgLL1
30	Laurasiatheria	Carnivora	Seal	Harbor seal	Phoca vitulina	IGLL1	XM_032397587.1	IgLL1
31	Laurasiatheria	Carnivora	Seal	Northern fur seal	Callorhinus ursinus	IGLL1
32	Laurasiatheria	Carnivora	Seal	Sea Otter	Enhydra lutris kenyoni	IGLL1	XM_022496042.1	IgLL5 (LOC111142747)
33	Laurasiatheria	Perissodactyla	Horse	Domestic horse	Equus caballus	IGLL1	NC_009150.3 (35,697,439..35,812,403)	IgLL3 (LOC100630636)
34	Laurasiatheria	Perissodactyla	Horse	Southern white rhinoceros	Ceratotherium simum simum	IGLL1	NW_004454281.1|:2482306-2500529	Unannotated
35	Laurasiatheria	Artiodactyla	Pig	Pig	Sus scrofa	IGLL1	XM_003132986.3	IgLL5 (LOC100523213)
36	Laurasiatheria	Artiodactyla	Cattle	Goat	Capra hircus	IGLL1	XM_018061192.1	IgLL5 (LOC106503064)
37	Laurasiatheria	Artiodactyla	Cattle	Arabian camel	Camelus dromedarius	IGLL1	NC_044542.1 (22293311..23228150)	IgLL1 (first 2 exons unannotated)
38	Laurasiatheria	Artiodactyla	Cattle	Alpaca	Vicugna pacos	IGLL1
39	Laurasiatheria	Artiodactyla	Cattle	American bison	Bison Bison	IGLL1	XM_010828879.1|6740617-6745604; NW_011495054.1| 14251482..14276070	IgLL5
40	Laurasiatheria	Artiodactyla	Cattle	Wild yak	Bos mutus	IGLL1	NW_005395494.1|238029-241925	IgLL7 (LOC106701410)
41	Laurasiatheria	Artiodactyla	Cattle	Water buffalo	Bubalus bubalis	IGLL1	NC_037561.1 (1201594..1205434)	VpreB1
42	Laurasiatheria	Artiodactyla	Cattle	Cattle	Bos Taurus	IGLL1	NM_001319903.1 | Chr17: 71,937,356-71,941,120	VpreB1
43	Laurasiatheria	Cetacea	Whale	Narwhal	Monodon monoceros	IGLL1
44	Laurasiatheria	Carnivora	Seal	Yangtze finless porpose	Neophocaena asiaeorientalis	IGLL1	XM_024763933.1|7,672,012..7,683,716	IgLL5 (LOC112412286)
45	Laurasiatheria	Cetacea	Whale	Vaquita	Phocoena sinus	IGLL1	XM_032654173.1	IgLL5 (LOC116765062)
46	Laurasiatheria	Cetacea	Whale	Beluga whale	Delphinapterus leucas	IGLL1	XM_022551357.1/NW_022098052.1:10639551-10650152	IgLL5 (LOC111162994)
47	Laurasiatheria	Cetacea	Whale	Sperm whale	Physeter catodon	IGLL1	NC_041232.1|:2357925-2366224	IgLL1
48	Laurasiatheria	Cetacea	Whale	Minke whale	Balaenoptera acutorostrata scammoni	IGLL1
49	Euarchontoglires	Lagomorpha	Rabbit	European rabbit	Oryctolagus cuniculus	IGLL1	XM_017340136	IgLL1
50	Euarchontoglires	Rodentia	Mouse	Chinese hamster	Cricetulus griseus	IGLL1	XM_027413385.2	IgLL5
51	Euarchontoglires	Rodentia	Mouse	House mouse	Mus musculus	IGLL1	NM_001190325.1	IgLL1
52	Euarchontoglires	Rodentia	Mouse	Ryukyu mouse	Mus caroli	IGLL1	XM_021185230.1	IgLL5
53	Euarchontoglires	Rodentia	Mouse	Shrew mouse	Mus pahari	IGLL1	XM_021209752.1	IgLL5
54	Euarchontoglires	Rodentia	Mouse	Upper Galilee Mountains blind mole rat	Nannospalax galili	IGLL1	XM_008842199.3	IgLL5
55	Euarchontoglires	Rodentia	Mouse	Norway rat	Rattus norvegicus	IGLL1	NC_051346.1|84138847-84142238	IgLL1
56	Euarchontoglires	Rodentia	Mouse	Mongolian Gerbil	Meriones unguiculatus	IGLL1	XM_021645925.1	IgLL5
57	Euarchontoglires	Scandentia	Tree shrew	Chinese tree shrew	Tupaia chinensis	IGLL1	XM_006140368.2	IgLL5 (LOC102498532)
58	Euarchontoglires	Dermoptera	Flying lemur	Sunda flying lemur	Galeopterus variegatus	IGLL1	XM_008563814.1	IgLL5 (LOC103582135)
59	Euarchontoglires	Primata (Strepsirhini)	Lemur	Gray mouse lemur	Microcebus murinus	IGLL1	XM_012784097.2|NC_033680.1 (21,090,538..21,098,407)	IgLL5 var X2 (LOC105882024)
60	Euarchontoglires	Primata	Macaque	Crab-eating macaque	Macaca fascicularis	IGLL1	XM_015444518.1|XP_015300004.1 (87,320,154..87,324,806)	IgLL1 isoform X1
61	Euarchontoglires	Primata	Human	Olive baboon	Papio anubis	IGLL1	NW_022165394.1	Genomic (LOC116273290)
62	Euarchontoglires	Primata	Human	Northern white-cheeked gibbon	Nomascus leucogenys	IGLL1	XM_003282060.4|126006..134392	IgLL1
63	Euarchontoglires	Primata	Human	Western lowland gorilla	Gorilla Gorilla	IGLL1	XM_004063141.3	IgLL1
64	Euarchontoglires	Primata	Human	Human	Homo sapiens	IGLL1	NM_001256296.2	IgLL5
